# Supplementary material for: Transcriptome-wide association study uncovers the role of essential genes in anthracycline-induced cardiotoxicity
Source: PubMed Central journal article supplement (PMC8140137; doi:10.1038/s41525-021-00199-4), 2021-05-21
Supplement: 41525_2021_199_MOESM1_ESM.pdf [file 41525_2021_199_MOESM1_ESM.pdf]

## Supplementary Figures

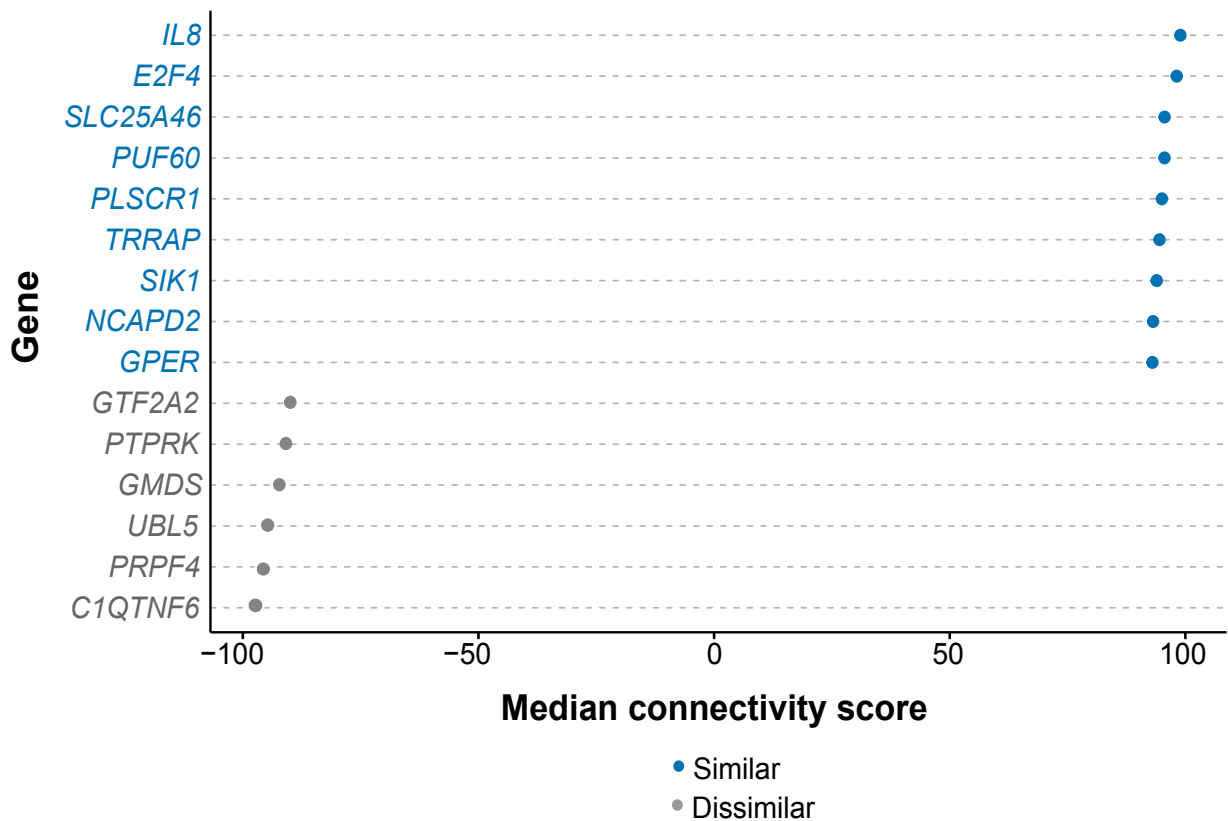

### Supplementary Figure 1. Gene perturbations with highly similar and dissimilar

**gene expression signatures to cases in the TWAS.** Expression signatures of

perturbations (gene knockdowns) in CMap were compared with those of the TWAS.

Perturbations with a median connectivity score  $> 90$  (similar gene signatures) or  $< -90$

(dissimilar gene signatures) are shown.

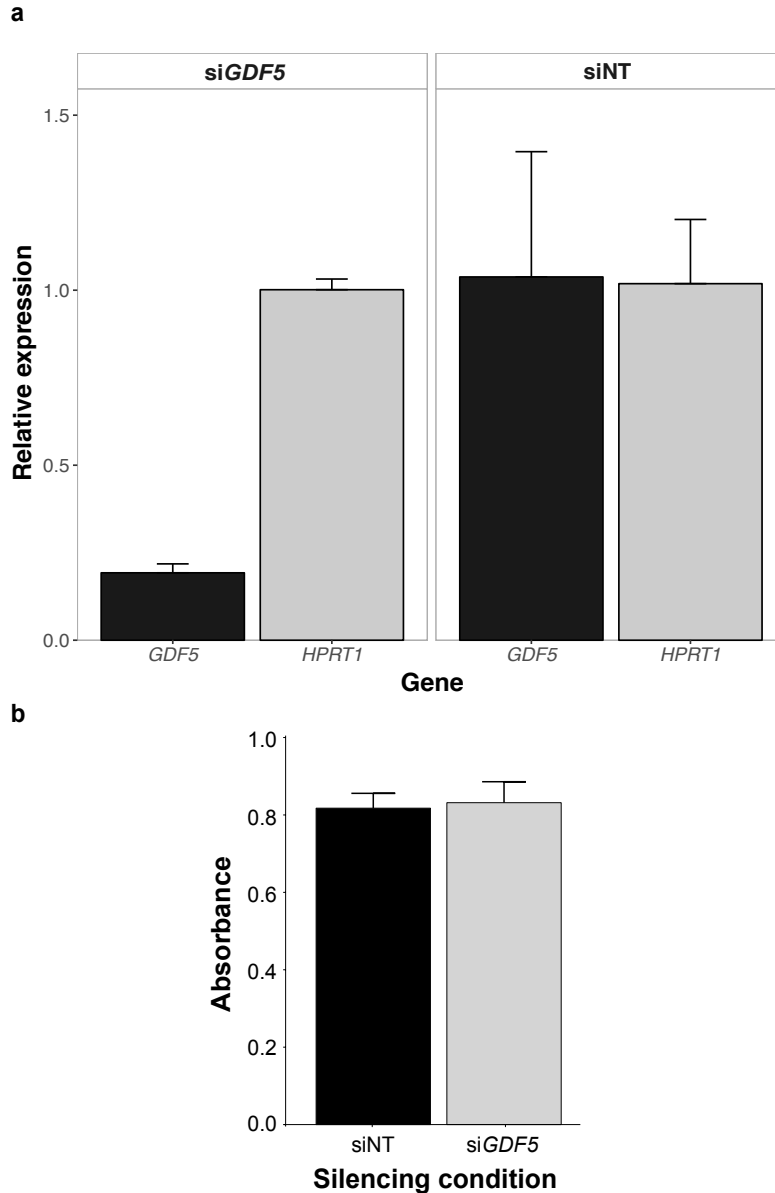

**Supplementary Figure 2. RNAi successfully silences *GDF5* and does not cause cell death. a** *GDF5* was silenced with siRNA and >75% silencing efficiency was achieved. Expression levels of *GDF5* as well as those of the housekeeping gene, *HPRT1*, were measured. Expression of *GDF5* was (1) specific to *GDF5* and silencing this gene did not affect expression of *HPRT1* (si*GDF5*), and (2) not affected by non-targeted silencing (siNT). **b** HCM cell absorbance was measured before treating the cells with doxorubicin and cell viability was not affected by si*GDF5* alone.

## Supplementary Tables

**Supplementary Table 1. Differential gene expression of TWAS associated genes in each tissue**

| Tissue                                 | <i>GDF5</i> |                       | <i>FRS2</i> |                       | <i>HDCC2</i> |                       | <i>EEF1B2</i> |      |
|----------------------------------------|-------------|-----------------------|-------------|-----------------------|--------------|-----------------------|---------------|------|
|                                        | Z-score     | P                     | Z-score     | P                     | Z-score      | P                     | Z-score       | P    |
| Adipose-Subcutaneous                   | -4.30       | 1.70x10 <sup>-5</sup> |             |                       | 3.53         | 4.15x10 <sup>-4</sup> |               |      |
| Adipose-Visceral (Omentum)             |             |                       |             |                       | 1.63         | 0.10                  |               |      |
| Adrenal Gland                          |             |                       |             |                       | 0.16         | 0.87                  |               |      |
| Artery-Aorta                           |             |                       |             |                       | 2.55         | 0.01                  |               |      |
| Artery-Coronary                        |             |                       |             |                       | 3.32         | 9.01x10 <sup>-4</sup> |               |      |
| Artery-Tibial                          |             |                       | -1.07       | 0.29                  | 3.14         | 1.70x10 <sup>-3</sup> |               |      |
| Brain-Anterior cingulate cortex (BA24) |             |                       |             |                       | 1.51         | 0.13                  |               |      |
| Brain-Cerebellum                       |             |                       |             |                       | -2.36        | 0.02                  |               |      |
| Brain-Cortex                           |             |                       |             |                       | 4.01         | 6.08x10 <sup>-5</sup> |               |      |
| Brain-Frontal Cortex (BA9)             |             |                       |             |                       | 2.30         | 0.02                  |               |      |
| Brain-Putamen (basal ganglia)          | -0.59       | 0.55                  |             |                       |              |                       |               |      |
| Breast-Mammary Tissue                  |             |                       | 0.78        | 0.43                  | 2.97         | 3.00x10 <sup>-3</sup> |               |      |
| Cells-EBV-transformed lymphocytes      |             |                       |             |                       | 2.06         | 0.04                  |               |      |
| Cells-Transformed fibroblasts          |             |                       | 2.29        | 0.02                  | 2.63         | 8.49x10 <sup>-3</sup> |               |      |
| Colon-Sigmoid                          | 0.11        | 0.92                  |             |                       | 3.08         | 2.05x10 <sup>-3</sup> |               |      |
| Colon-Transverse                       |             |                       | 3.61        | 3.12x10 <sup>-4</sup> | 3.44         | 5.91x10 <sup>-4</sup> |               |      |
| Esophagus-Gastroesophageal Junction    | -1.54       | 0.12                  | 1.08        | 0.28                  | 3.28         | 1.03x10 <sup>-3</sup> |               |      |
| Esophagus-Mucosa                       |             |                       |             |                       | 3.32         | 9.01x10 <sup>-4</sup> |               |      |
| Esophagus-Muscularis                   | -1.19       | 0.23                  | 0.12        | 0.91                  | 3.34         | 8.38x10 <sup>-4</sup> | -0.51         | 0.61 |
| Heart-Atrial Appendage                 | -1.53       | 0.13                  |             |                       | 3.61         | 3.04x10 <sup>-4</sup> |               |      |
| Heart-Left Ventricle                   |             |                       | -0.96       | 0.34                  | 3.30         | 9.79x10 <sup>-4</sup> |               |      |

|                                   |       |      |       |                       |       |                       |       |                       |
|-----------------------------------|-------|------|-------|-----------------------|-------|-----------------------|-------|-----------------------|
| Lung                              | 1.63  | 0.10 |       |                       | 3.44  | 5.76x10 <sup>-4</sup> |       |                       |
| Minor Salivary Gland              |       |      |       |                       | 2.99  | 2.79x10 <sup>-3</sup> |       |                       |
| Muscle-Skeletal                   |       |      | -1.24 | 0.21                  | 2.85  | 4.40x10 <sup>-3</sup> | -1.57 | 0.12                  |
| Nerve-Tibial                      |       |      | 2.30  | 0.02                  |       |                       |       |                       |
| Ovary                             |       |      |       |                       | 2.19  | 0.03                  |       |                       |
| Pancreas                          |       |      | 4.07  | 4.67x10 <sup>-5</sup> | 3.13  | 1.75x10 <sup>-3</sup> |       |                       |
| Pituitary                         | -1.89 | 0.06 |       |                       | 1.32  | 0.19                  |       |                       |
| Skin-Not Sun Exposed (Suprapubic) |       |      |       |                       | 3.35  | 8.11x10 <sup>-4</sup> |       |                       |
| Skin-Sun Exposed (Lower leg)      |       |      | 1.39  | 0.17                  | 2.77  | 5.63x10 <sup>-3</sup> |       |                       |
| Small Intestine-Terminal Ileum    |       |      |       |                       | 3.07  | 2.17x10 <sup>-3</sup> |       |                       |
| Spleen                            |       |      | 2.39  | 0.02                  | -0.56 | 0.58                  |       |                       |
| Stomach                           |       |      | -1.99 | 0.05                  | 3.51  | 4.51x10 <sup>-4</sup> |       |                       |
| Testis                            | 1.47  | 0.14 |       |                       | -1.77 | 0.08                  |       |                       |
| Thyroid                           | 0.87  | 0.39 | 1.90  | 0.06                  | 3.26  | 1.11x10 <sup>-3</sup> |       |                       |
| Vagina                            |       |      |       |                       |       |                       | -3.97 | 7.24x10 <sup>-5</sup> |
| Whole Blood                       |       |      | -0.19 | 0.85                  | 2.76  | 5.72x10 <sup>-3</sup> |       |                       |

Shaded cells indicate no differential expression

**Supplementary Table 2. Publicly-available and cardiotoxic/cardioprotective gene sets**

| Gene Set                            | Description                                                         | Number of genes | Reference(s) |
|-------------------------------------|---------------------------------------------------------------------|-----------------|--------------|
| <b>Publicly-available gene sets</b> |                                                                     |                 |              |
| FDA-approved drug targets           | Genes whose protein products are targets for FDA-approved drugs     | 385             | 7–11         |
| Drug targets (Nelson et al., 2012)  | Drug targets                                                        | 201             | 12,13        |
| All dominant genes                  | OMIM disease genes that follow autosomal dominant inheritance       | 709             | 14,15        |
| All recessive genes                 | OMIM disease genes that follow autosomal recessive inheritance      | 1183            | 14,15        |
| Essential in culture                | Genes essential in human cell lines                                 | 283             | 16           |
| Essential in mice                   | Genes intolerant to homozygous knockout in mice                     | 2454            | 17–19        |
| Genes nearest to GWAS peaks         | Genes closest to GWAS hits ( $p < 5E-8$ ) in the NHGRI GWAS catalog | 6336            | 20           |

21, Updated table:

|                                                              |                                                                                                            |      |                                                                                                                                                                                           |
|--------------------------------------------------------------|------------------------------------------------------------------------------------------------------------|------|-------------------------------------------------------------------------------------------------------------------------------------------------------------------------------------------|
| DNA repair genes<br>(Wood et al., 2005)                      | Human DNA repair<br>genes                                                                                  | 178  | <a href="https://www.mdanderson.org/documents/Labs/Wood-Laboratory/human-dna-repair-genes.html">https://www.mdanderson.org/documents/Labs/Wood-Laboratory/human-dna-repair-genes.html</a> |
| DNA repair genes<br>(Kang et al., 2012)                      | DNA repair genes<br>derived from DNA repair<br>pathways                                                    | 151  | 22                                                                                                                                                                                        |
| ClinGen<br>haploinsufficient genes                           | Genes with evidence for<br>dosage pathogenicity<br>according to the ClinGen<br>Dosage Sensitivity Map      | 294  | 23                                                                                                                                                                                        |
| Olfactory receptors                                          | Olfactory receptors                                                                                        | 371  | 24                                                                                                                                                                                        |
| Genes with any<br>disease association<br>reported in ClinVar | All genes in ClinVar for<br>which there is at least<br>one pathogenic or likely<br>pathogenic variant      | 3078 | 25                                                                                                                                                                                        |
| Kinases                                                      | Uniprot's list of protein<br>kinases                                                                       | 347  | 26–29                                                                                                                                                                                     |
| GPCRs                                                        | GPCR list from<br><a href="http://guidetopharmacology.org">guidetopharmacology.org</a><br>and from UniProt | 759  | 29–31                                                                                                                                                                                     |
| Natural product targets                                      | Targets of natural<br>products                                                                             | 37   | 32                                                                                                                                                                                        |
| BROCA - Cancer Risk<br>Panel                                 | Cancer risk panel<br>consisting of genes<br>involved in various<br>cancers for individuals                 | 66   | <a href="http://tests.labmed.washington.edu/BROCA">http://tests.labmed.washington.edu/BROCA</a>                                                                                           |

|                                               |                                                                                                                                          |        |    |
|-----------------------------------------------|------------------------------------------------------------------------------------------------------------------------------------------|--------|----|
|                                               | suspected to have a hereditary cancer predisposition                                                                                     |        |    |
| ACMG V2.0                                     | List of genes to be reported as incidental or secondary findings developed by the ACMG                                                   | 59     | 33 |
| GPI-anchored proteins                         | Proteins in UniProt that are GPI-anchored                                                                                                | 135    | 29 |
| Universe                                      | Protein-coding genes according to HGNC                                                                                                   | 19 194 | 34 |
| LoF intolerant                                | Genes deemed intolerant to loss of function mutations in ExAC                                                                            | 3230   | 35 |
| <b>Cardiotoxic/cardioprotective gene sets</b> |                                                                                                                                          |        |    |
| Cluster 1                                     | Genes down-regulated in hiPSC-CMs across a gradient of 5 different concentrations of doxorubicin                                         | 3062   | 36 |
| Cluster 2                                     | Genes initially up-regulated and then further down-regulated in hiPSC-CMs across a gradient of 5 different concentrations of doxorubicin | 3517   | 36 |

|           |                                                                                                                                                                    |      |    |
|-----------|--------------------------------------------------------------------------------------------------------------------------------------------------------------------|------|----|
| Cluster 3 | Genes up-regulated in hiPSC-CMs across a gradient of 5 different concentrations of doxorubicin                                                                     | 2026 | 36 |
| Cluster 4 | Genes down-regulated at lower concentrations and up-regulated at higher concentrations across a gradient of 5 different concentrations of doxorubicin in hiPSC-CMs | 1150 | 36 |
| Cluster 5 | Genes up-regulated at lower concentrations and down-regulated at higher concentrations across a gradient of 5 different concentrations of doxorubicin in hiPSC-CMs | 1419 | 36 |
| Cluster 6 | Genes down-regulated at low concentrations but then partially recover at higher concentrations across a gradient of 5 different concentrations                     | 1143 | 36 |



| of doxorubicin in hiPSC-<br>CMs |                                                                                        |     |     |
|---------------------------------|----------------------------------------------------------------------------------------|-----|-----|
| ATRA up                         | Genes up-regulated in<br>response to treating<br>H9c2 cells with ATRA                  | 76  | N/A |
| ATRA down                       | Genes down-regulated in<br>response to treating<br>H9c2 cells with ATRA                | 175 | N/A |
| ATRA                            | All genes up- or down-<br>regulated in response to<br>treating H9c2 cells with<br>ATRA | 251 | N/A |

**Supplementary Table 3. Significantly enriched gene sets in heart and arterial tissues**

| Gene set                                      | Heart and arterial tissues |             |       | Heart tissue |             |       |
|-----------------------------------------------|----------------------------|-------------|-------|--------------|-------------|-------|
|                                               | Mean $Z^2$                 | Mean $Z^2$  | $P^a$ | Mean $Z^2$   | Mean $Z^2$  | $P^a$ |
|                                               | (gene set)                 | (all genes) |       | (gene set)   | (all genes) |       |
| <b>Publicly-available gene sets</b>           |                            |             |       |              |             |       |
| Essential in mice                             | 0.91                       | 0.83        | 0.16  | 0.95         | 0.84        | 0.07  |
| Essential in culture                          | 1.09                       | 0.84        | 0.04  | 1.09         | 0.84        | 0.12  |
| Human LoF intolerant                          | 0.92                       | 0.83        | 0.06  | 0.95         | 0.84        | 1.00  |
| <b>Cardiotoxic/cardioprotective gene sets</b> |                            |             |       |              |             |       |
| ATRA (downregulated)                          | 0.98                       | 0.84        | 0.41  | 1.15         | 0.85        | 0.61  |
| Cluster 5 <sup>b</sup>                        | 0.85                       | 0.84        | 1.00  | 0.90         | 0.85        | 0.48  |

<sup>a</sup>Bonferroni adjusted

<sup>b</sup>Described by Knowles *et al.*<sup>36</sup>

LoF indicates loss of function and ATRA indicates all-trans retinoic acid.

**Supplementary Table 4. Comparison of discovery and replication studies**

|                   | <i>Aminkeng et al.</i>                                                                                                                                                                                                                               | <i>Schneider et al.</i>                                                                                                                                                                                                                                                                                                    |
|-------------------|------------------------------------------------------------------------------------------------------------------------------------------------------------------------------------------------------------------------------------------------------|----------------------------------------------------------------------------------------------------------------------------------------------------------------------------------------------------------------------------------------------------------------------------------------------------------------------------|
| Sample size       | 280 (32 cases, 248 controls)                                                                                                                                                                                                                         | 845 (51 cases, 794 controls)                                                                                                                                                                                                                                                                                               |
| Population        | Children                                                                                                                                                                                                                                             | Adults                                                                                                                                                                                                                                                                                                                     |
| Ancestry          | European                                                                                                                                                                                                                                             | European                                                                                                                                                                                                                                                                                                                   |
| Major cancer type | Acute lymphoblastic leukemia                                                                                                                                                                                                                         | Breast                                                                                                                                                                                                                                                                                                                     |
| GWAS covariates   | <ul style="list-style-type: none"> <li>• Age at start of treatment</li> <li>• Cumulative anthracycline dose</li> <li>• Tumour type (acute lymphoblastic leukemia, Ewing's sarcoma, rhabdomyosarcoma)</li> <li>• Cardiac radiation therapy</li> </ul> | <ul style="list-style-type: none"> <li>• Age</li> <li>• Menopausal status</li> <li>• Experimental arm</li> <li>• Tumour grade</li> <li>• Body surface area</li> <li>• Hypertension during therapy</li> <li>• Use of antihypertension medications at baseline or antihypertensive therapy added during treatment</li> </ul> |

## Supplementary References

1. Greene RF, Collins JM, Jenkins JF, Speyer JL, Myers CE. Plasma Pharmacokinetics of Adriamycin and Adriamycinol: Implications for the Design of in Vitro Experiments and Treatment Protocols. *Cancer Res.* 1983;43(7):3417-3421.
2. Liu J, Zheng H, Tang M, Ryu Y-C, Wang X. A therapeutic dose of doxorubicin activates ubiquitin-proteasome system-mediated proteolysis by acting on both the ubiquitination apparatus and proteasome. *Am J Physiol-Heart Circ Physiol.* 2008;295(6):H2541-H2550. doi:10.1152/ajpheart.01052.2008
3. Wickham H. *Ggplot2: Elegant Graphics for Data Analysis*. Springer-Verlag; 2009. Accessed November 13, 2018. //www.springer.com/gp/book/9780387981413
4. Kassambara, Alboukadel. ggpubr: “ggplot2” based publication ready plots. R package version 0.2.2.
5. Bray NL, Pimentel H, Melsted P, Pachter L. Near-optimal probabilistic RNA-seq quantification. *Nat Biotechnol.* 2016;34(5):525-527. doi:10.1038/nbt.3519
6. Pimentel H, Bray NL, Puente S, Melsted P, Pachter L. Differential analysis of RNA-seq incorporating quantification uncertainty. *Nat Methods.* 2017;14(7):687-690. doi:10.1038/nmeth.4324
7. Knox C, Law V, Jewison T, et al. DrugBank 3.0: a comprehensive resource for ‘Omics’ research on drugs. *Nucleic Acids Res.* 2011;39(suppl\_1):D1035-D1041. doi:10.1093/nar/gkq1126

8. Law V, Knox C, Djoumbou Y, et al. DrugBank 4.0: shedding new light on drug metabolism. *Nucleic Acids Res.* 2014;42(D1):D1091-D1097.  
doi:10.1093/nar/gkt1068
9. Wishart DS, Knox C, Guo AC, et al. DrugBank: a comprehensive resource for in silico drug discovery and exploration. *Nucleic Acids Res.* 2006;34(suppl\_1):D668-D672. doi:10.1093/nar/gkj067
10. Wishart DS, Knox C, Guo AC, et al. DrugBank: a knowledgebase for drugs, drug actions and drug targets. *Nucleic Acids Res.* 2008;36(suppl\_1):D901-D906.  
doi:10.1093/nar/gkm958
11. Wishart DS, Feunang YD, Guo AC, et al. DrugBank 5.0: a major update to the DrugBank database for 2018. *Nucleic Acids Res.* 2018;46(D1):D1074-D1082.  
doi:10.1093/nar/gkx1037
12. Nelson MR, Wegmann D, Ehm MG, et al. An Abundance of Rare Functional Variants in 202 Drug Target Genes Sequenced in 14,002 People. *Science.* 2012;337(6090):100-104. doi:10.1126/science.1217876
13. Russ AP, Lampel S. The druggable genome: an update. *Drug Discov Today.* 2005;10(23):1607-1610. doi:10.1016/S1359-6446(05)03666-4
14. Berg JS, Adams M, Nassar N, et al. An informatics approach to analyzing the incidentalome. *Genet Med.* 2013;15(1):36-44. doi:10.1038/gim.2012.112

15. Blekhman R, Man O, Herrmann L, et al. Natural Selection on Genes that Underlie Human Disease Susceptibility. *Curr Biol.* 2008;18(12):883-889.  
doi:10.1016/j.cub.2008.04.074
16. Hart T, Brown KR, Sircoulomb F, Rottapel R, Moffat J. Measuring error rates in genomic perturbation screens: gold standards for human functional genomics. *Mol Syst Biol.* 2014;10(7):733. doi:10.15252/msb.20145216
17. Blake JA, Bult CJ, Kadin JA, Richardson JE, Eppig JT. The Mouse Genome Database (MGD): premier model organism resource for mammalian genomics and genetics. *Nucleic Acids Res.* 2011;39(suppl\_1):D842-D848.  
doi:10.1093/nar/gkq1008
18. Georgi B, Voight BF, Bućan M. From Mouse to Human: Evolutionary Genomics Analysis of Human Orthologs of Essential Genes. *PLOS Genet.* 2013;9(5):e1003484. doi:10.1371/journal.pgen.1003484
19. Liu X, Jian X, Boerwinkle E. dbNSFP v2.0: A Database of Human Non-synonymous SNVs and Their Functional Predictions and Annotations. *Hum Mutat.* 2013;34(9):E2393-E2402. doi:10.1002/humu.22376
20. MacArthur J, Bowler E, Cerezo M, et al. The new NHGRI-EBI Catalog of published genome-wide association studies (GWAS Catalog). *Nucleic Acids Res.* 2017;45(D1):D896-D901. doi:10.1093/nar/gkw1133
21. Wood RD, Mitchell M, Lindahl T. Human DNA repair genes, 2005. *Mutat Res Mol Mech Mutagen.* 2005;577(1):275-283. doi:10.1016/j.mrfmmm.2005.03.007

22. Kang J, D'Andrea AD, Kozono D. A DNA Repair Pathway–Focused Score for Prediction of Outcomes in Ovarian Cancer Treated With Platinum-Based Chemotherapy. *JNCI J Natl Cancer Inst.* 2012;104(9):670-681.  
doi:10.1093/jnci/djs177
23. Rehm HL, Berg JS, Brooks LD, et al. ClinGen — The Clinical Genome Resource. *N Engl J Med.* 2015;372(23):2235-2242. doi:10.1056/NEJMSr1406261
24. Mainland JD, Li YR, Zhou T, Liu WLL, Matsunami H. Human olfactory receptor responses to odorants. *Sci Data.* 2015;2:150002. doi:10.1038/sdata.2015.2
25. Landrum MJ, Lee JM, Riley GR, et al. ClinVar: public archive of relationships among sequence variation and human phenotype. *Nucleic Acids Res.* 2014;42(D1):D980-D985. doi:10.1093/nar/gkt1113
26. Hunter T. Signaling—2000 and Beyond. *Cell.* 2000;100(1):113-127.  
doi:10.1016/S0092-8674(00)81688-8
27. Manning G, Whyte DB, Martinez R, Hunter T, Sudarsanam S. The Protein Kinase Complement of the Human Genome. *Science.* 2002;298(5600):1912-1934.  
doi:10.1126/science.1075762
28. Miranda-Saavedra D, Barton GJ. Classification and functional annotation of eukaryotic protein kinases. *Proteins Struct Funct Bioinforma.* 2007;68(4):893-914.  
doi:10.1002/prot.21444

29. UniProt Consortium T. UniProt: the universal protein knowledgebase. *Nucleic Acids Res.* 2018;46(5):2699-2699. doi:10.1093/nar/gky092
30. Alexander SP, Christopoulos A, Davenport AP, et al. THE CONCISE GUIDE TO PHARMACOLOGY 2017/18: G protein-coupled receptors: THE CONCISE GUIDE TO PHARMACOLOGY 2017/18: G protein-coupled receptors. *Br J Pharmacol.* 2017;174:S17-S129. doi:10.1111/bph.13878
31. Harding SD, Sharman JL, Faccenda E, et al. The IUPHAR/BPS Guide to PHARMACOLOGY in 2018: updates and expansion to encompass the new guide to IMMUNOPHARMACOLOGY. *Nucleic Acids Res.* 2018;46(D1):D1091-D1106. doi:10.1093/nar/gkx1121
32. Dančik V, Seiler KP, Young DW, Schreiber SL, Clemons PA. Distinct Biological Network Properties between the Targets of Natural Products and Disease Genes. *J Am Chem Soc.* 2010;132(27):9259-9261. doi:10.1021/ja102798t
33. Kalia SS, Adelman K, Bale SJ, et al. Recommendations for reporting of secondary findings in clinical exome and genome sequencing, 2016 update (ACMG SF v2.0): a policy statement of the American College of Medical Genetics and Genomics. *Genet Med.* 2017;19(2):249-255. doi:10.1038/gim.2016.190
34. Gray KA, Yates B, Seal RL, Wright MW, Bruford EA. Genenames.org: the HGNC resources in 2015. *Nucleic Acids Res.* 2015;43(Database issue):D1079-D1085. doi:10.1093/nar/gku1071



35. Lek M, Karczewski KJ, Minikel EV, et al. Analysis of protein-coding genetic variation in 60,706 humans. *Nature*. 2016;536(7616):285-291.  
doi:10.1038/nature19057
36. Knowles DA, Burrows CK, Blischak JD, et al. Determining the genetic basis of anthracycline-cardiotoxicity by molecular response QTL mapping in induced cardiomyocytes. *eLife*. 2018;7:e33480.
